# Supplementary material for: Multiple decisions about one object involve parallel sensory acquisition but time-multiplexed evidence incorporation
Source: eLife journal article supplement (doi:10.7554/elife.63721), 2021-03-10

**A**

Eye

strong  
motionweak  
motionstrong  
color— serial  
— parallel  
▪ dataweak  
color0 5  
RT (s)**B**

Unimanual

strong  
motionweak  
motionstrong  
colorweak  
color0 5  
RT (s)**C**

Bimanual

strong  
motionweak  
motionstrong  
colorweak  
color0 5  
RT (s)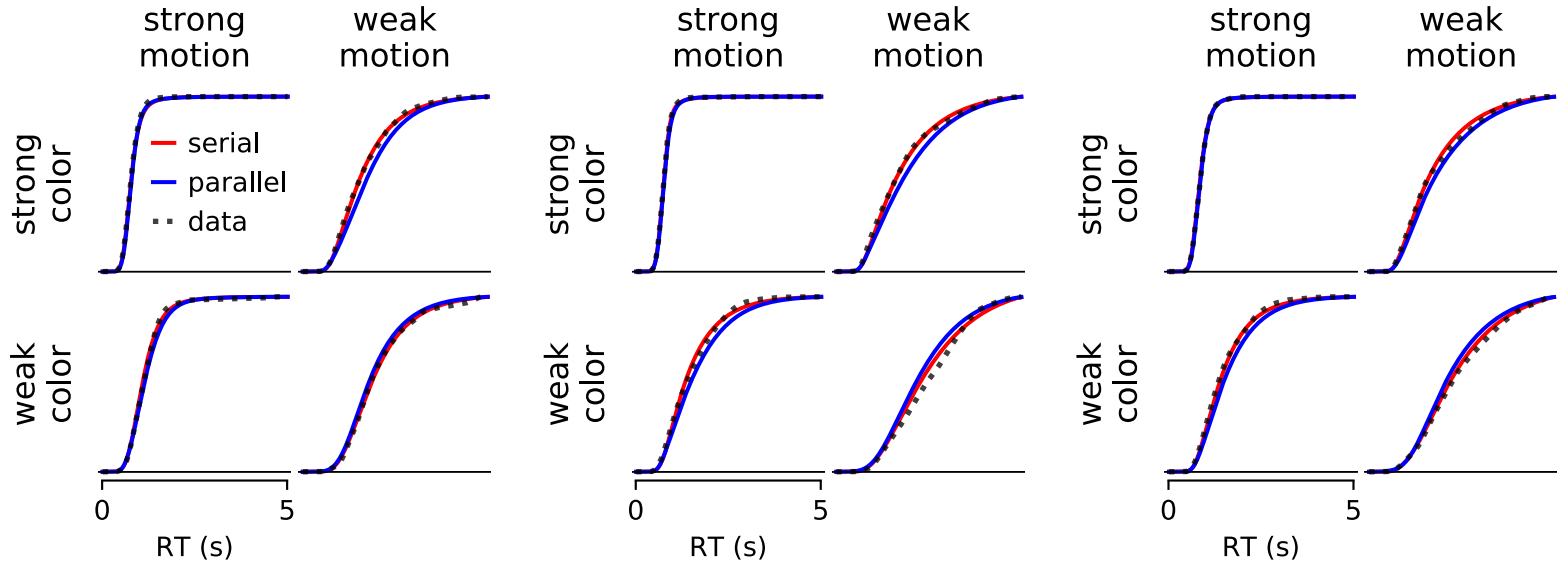

Supplement: supp [file elife-63721-supp-v1.zip]
