# Supplementary figures and images for: Multiple decisions about one object involve parallel sensory acquisition but time-multiplexed evidence incorporation
Source: eLife journal article supplement (doi:10.7554/elife.63721), 2021-03-10

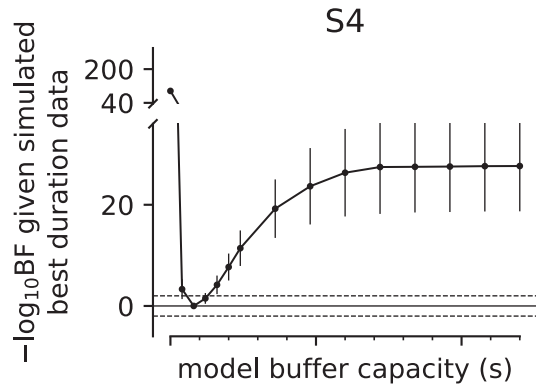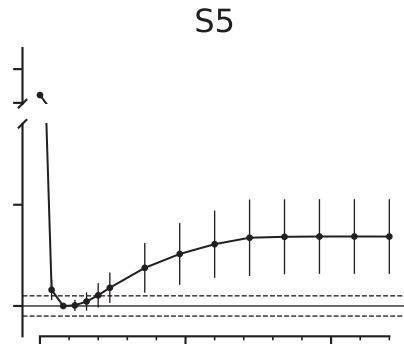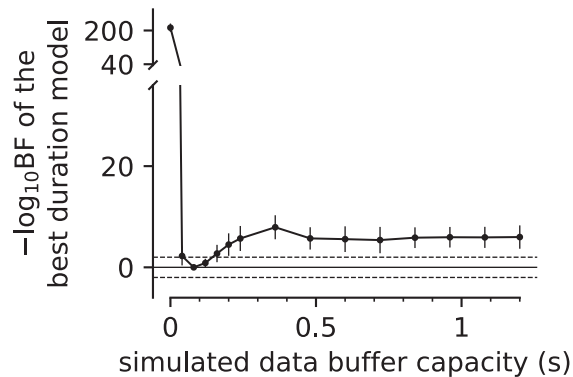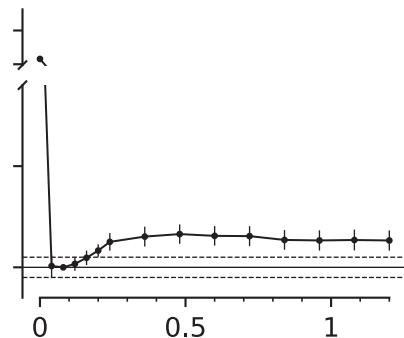

Supplement: supp [file elife-63721-supp-v1.zip]

S4

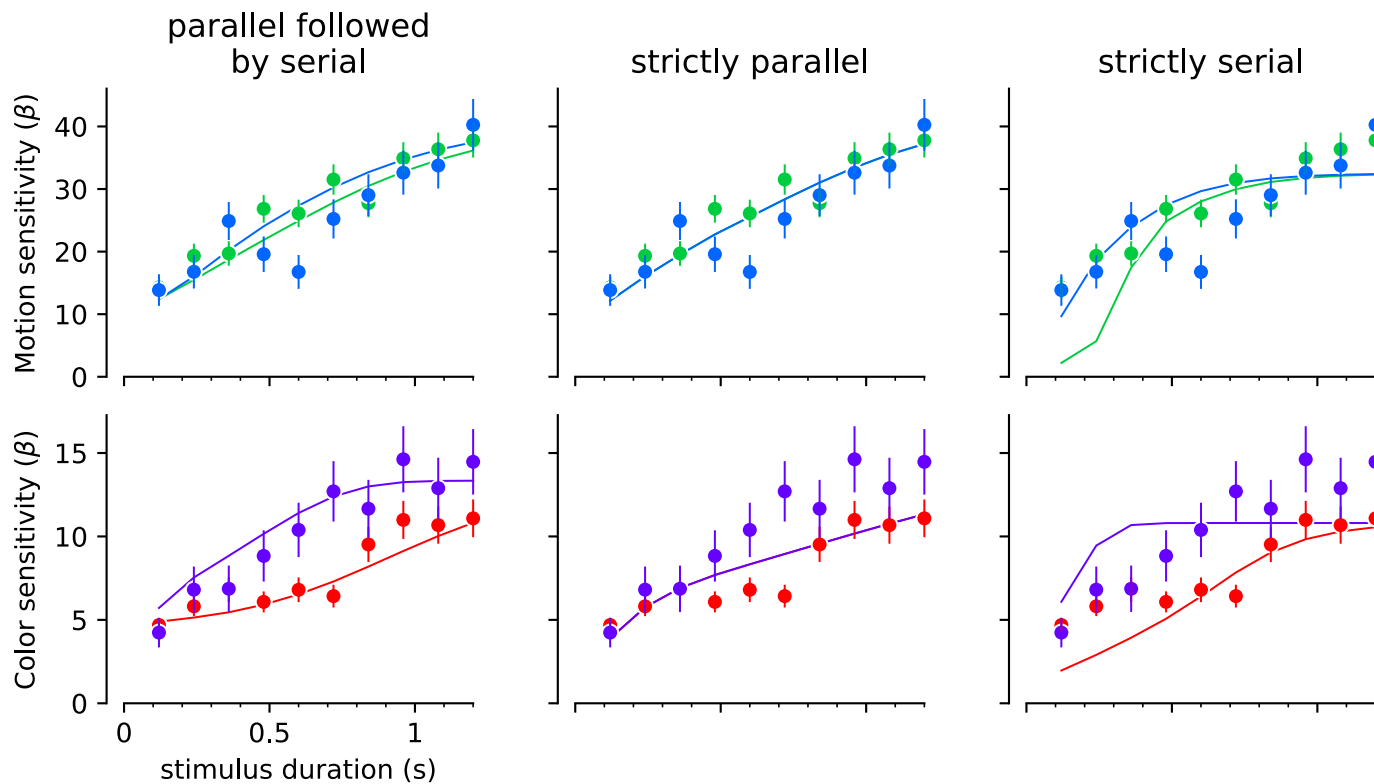

S5

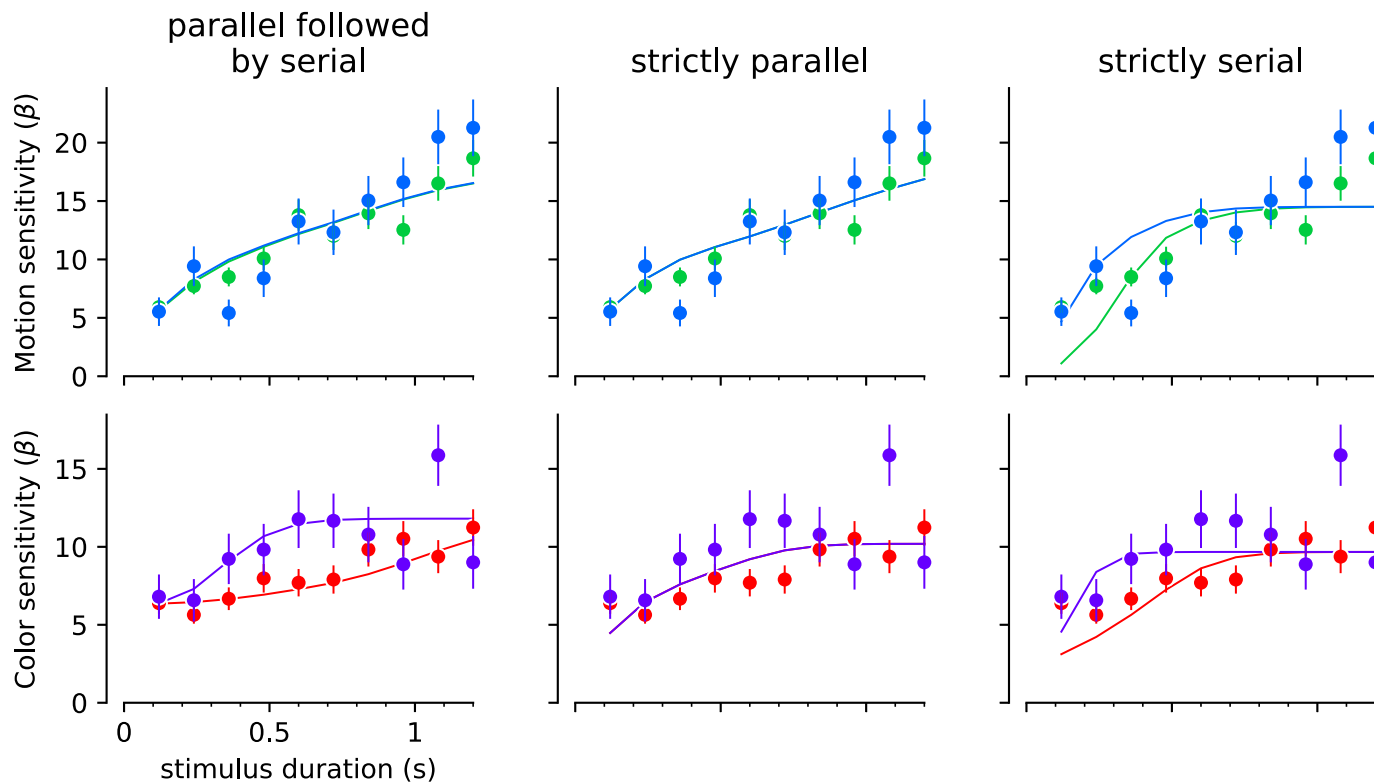

Supplement: supp [file elife-63721-supp-v1.zip]

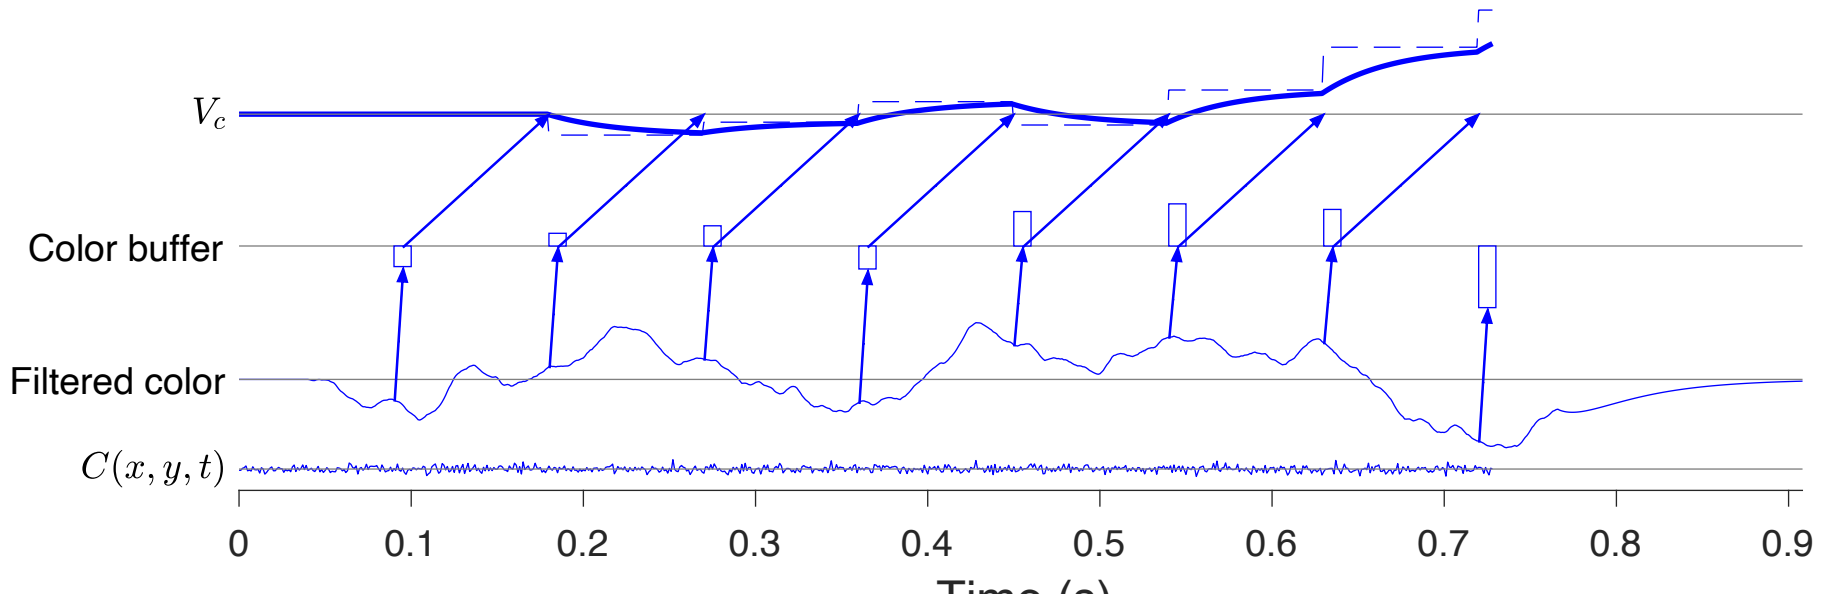

Supplement: supp [file elife-63721-supp-v1.zip]

**A**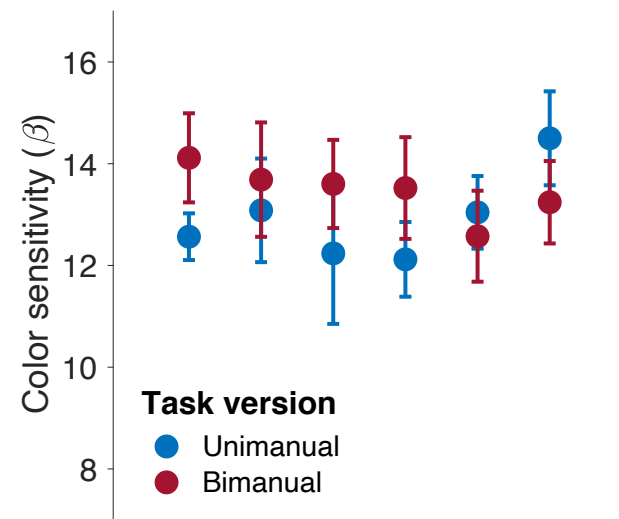**B**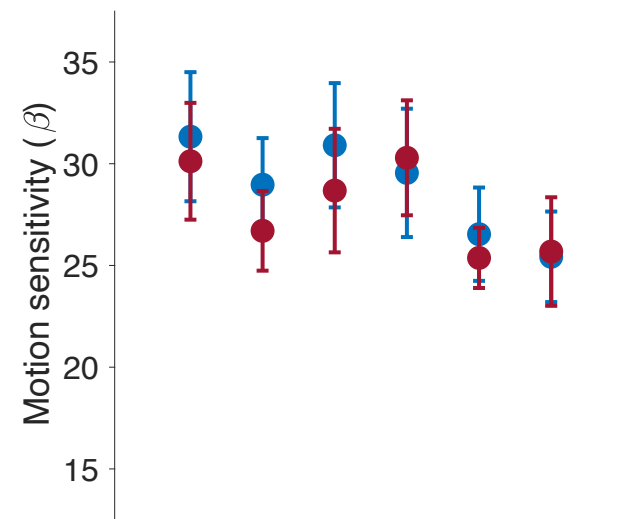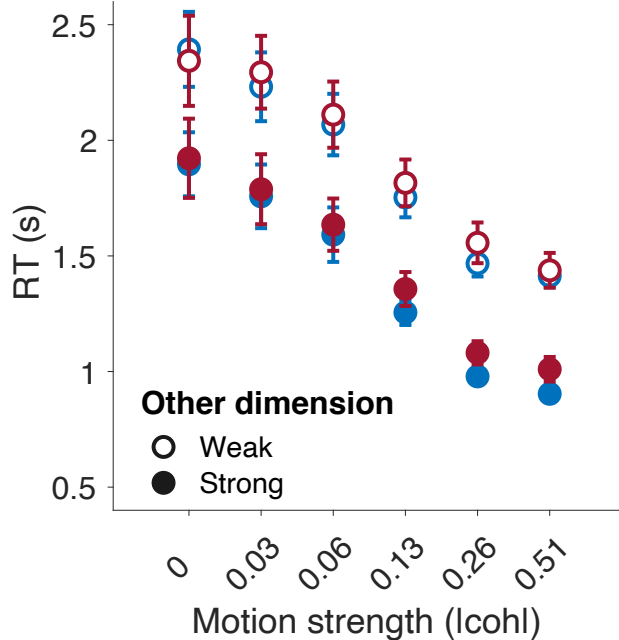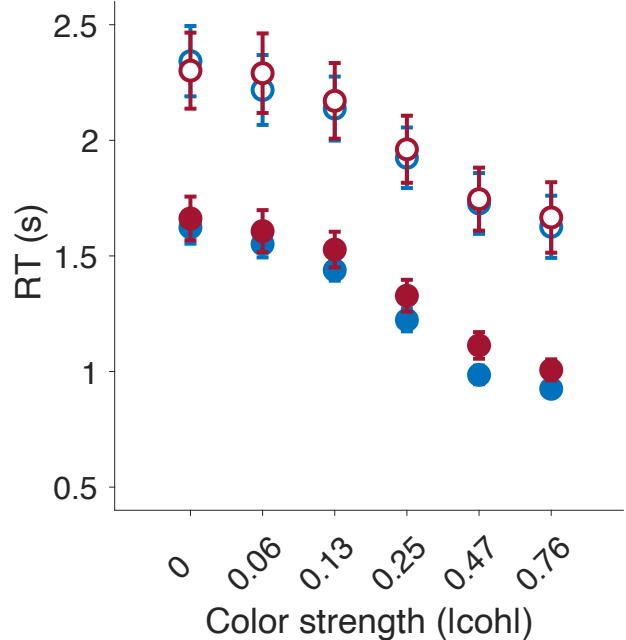

Supplement: supp [file elife-63721-supp-v1.zip]

# A

S7

S12

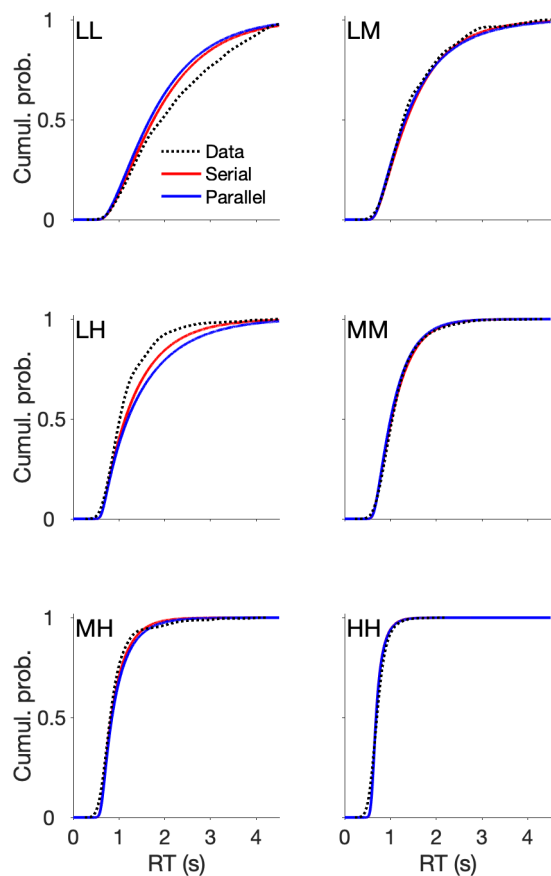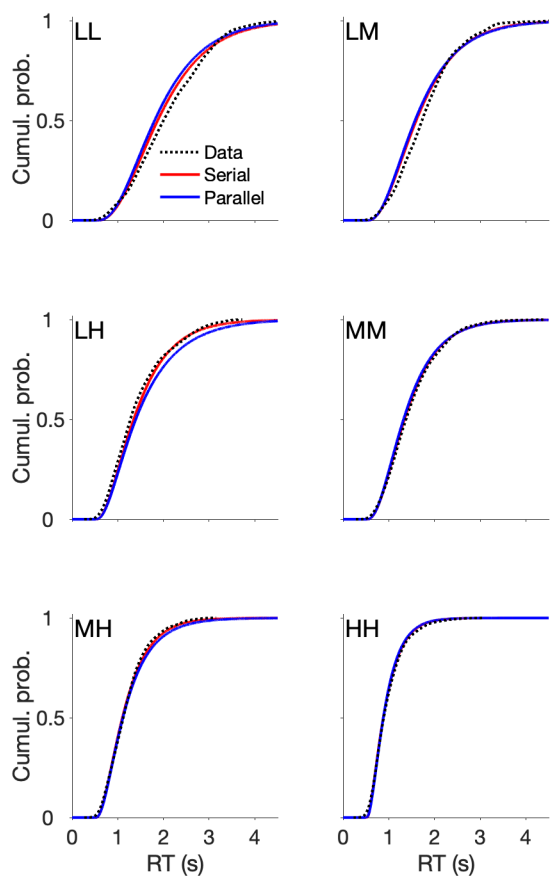

# B

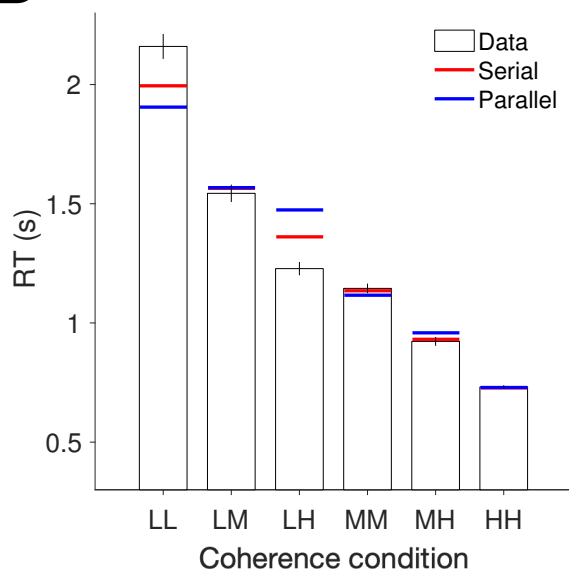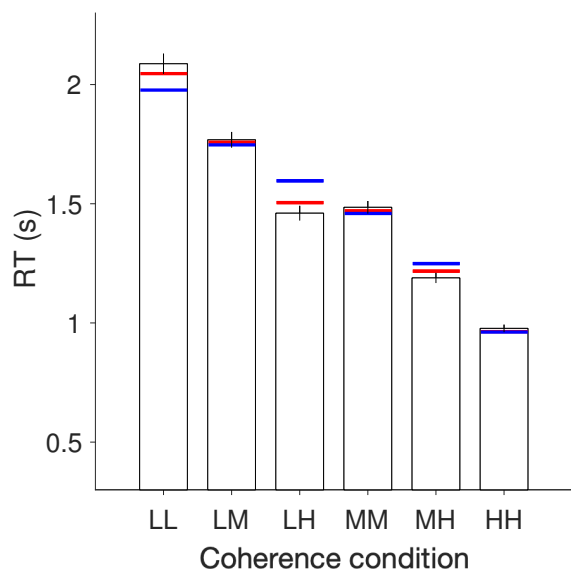

Supplement: supp [file elife-63721-supp-v1.zip]

**A****Eye**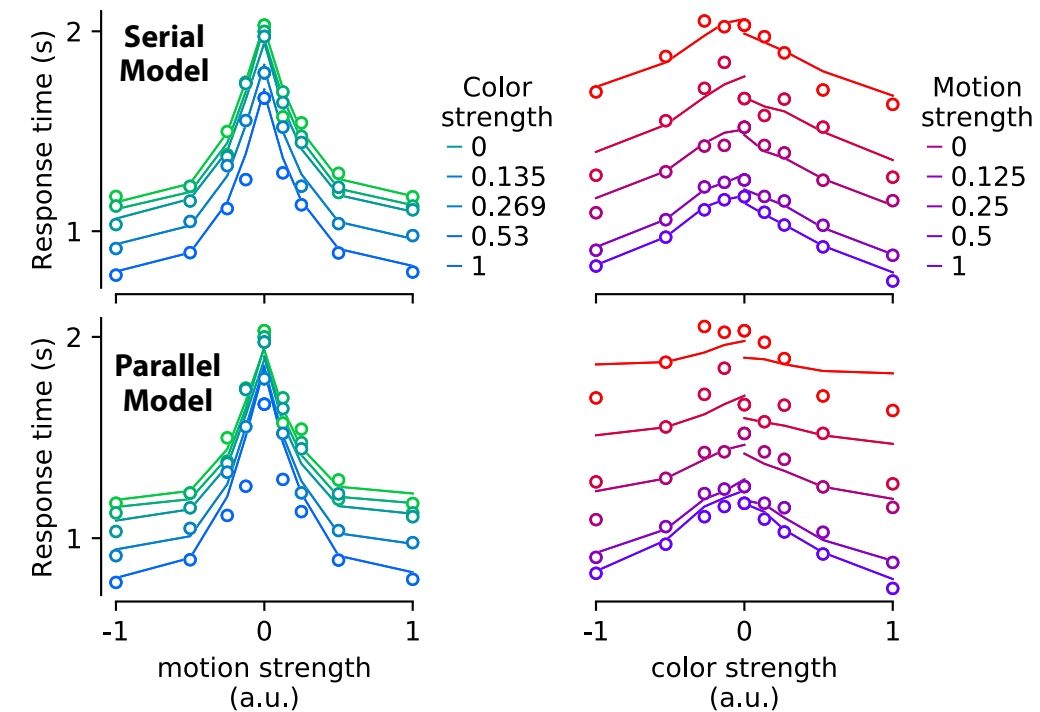**B****Unimanual**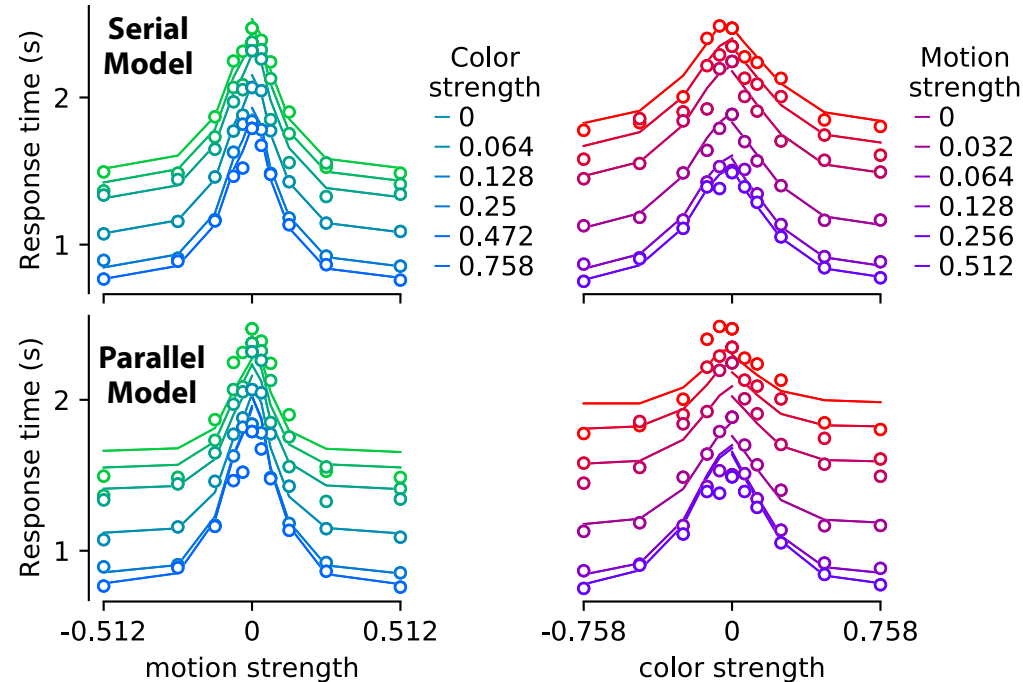**C****Bimanual**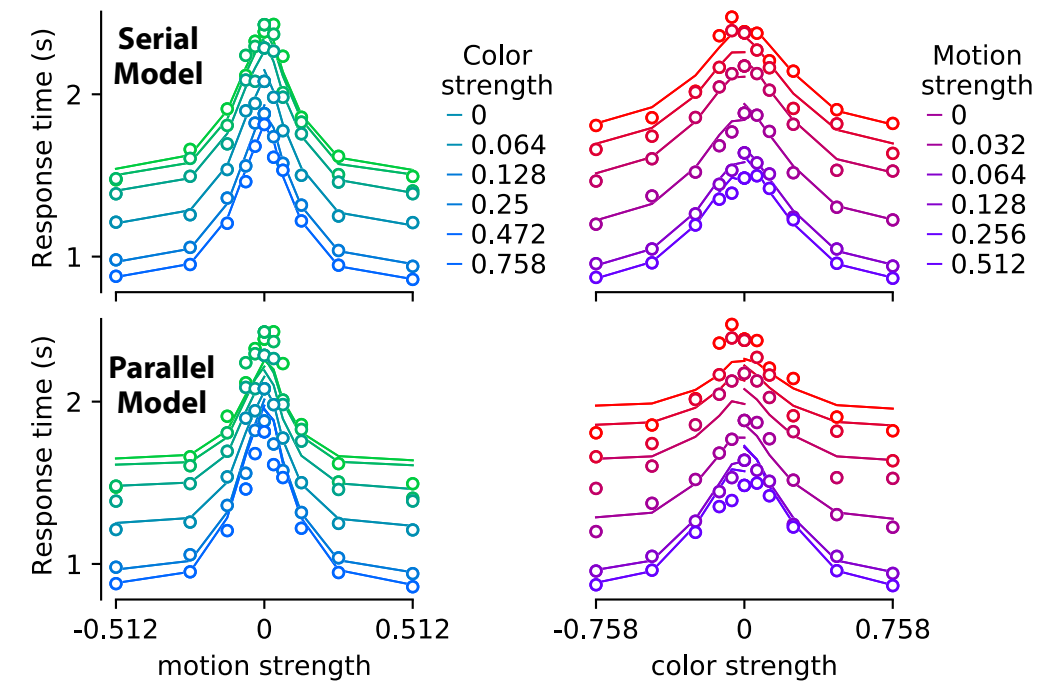

Supplement: supp [file elife-63721-supp-v1.zip]

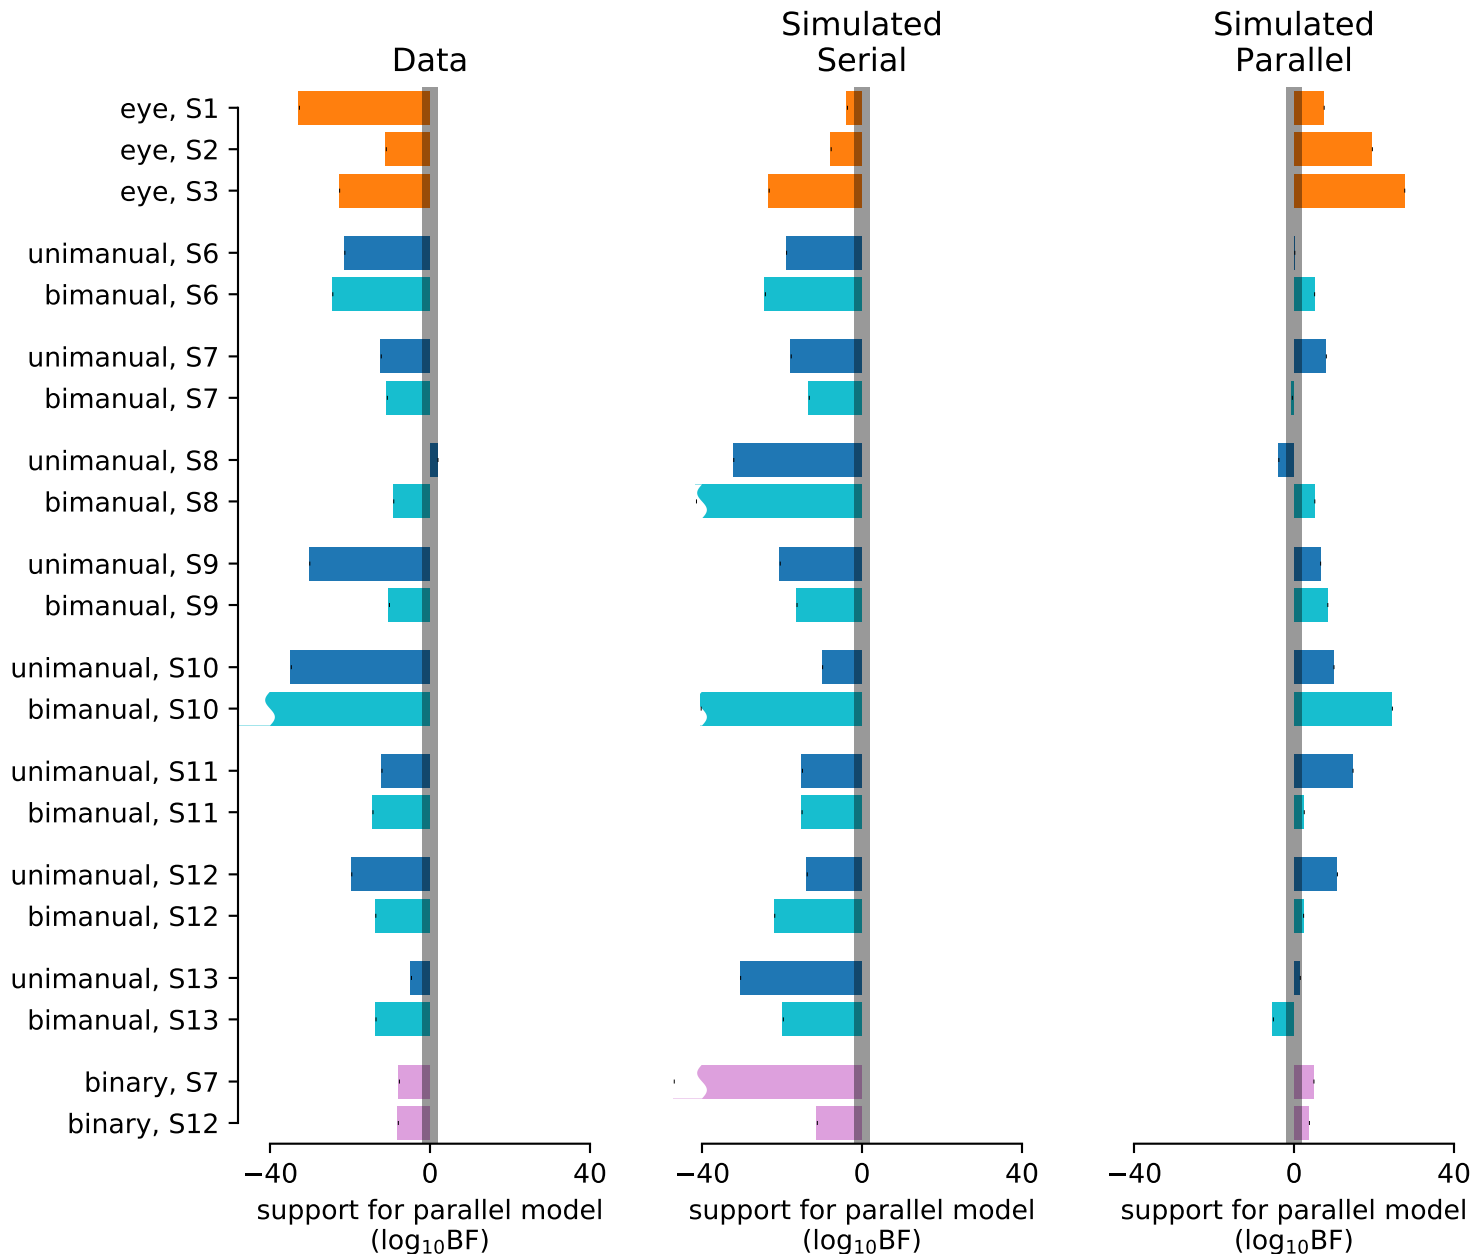

Supplement: supp [file elife-63721-supp-v1.zip]

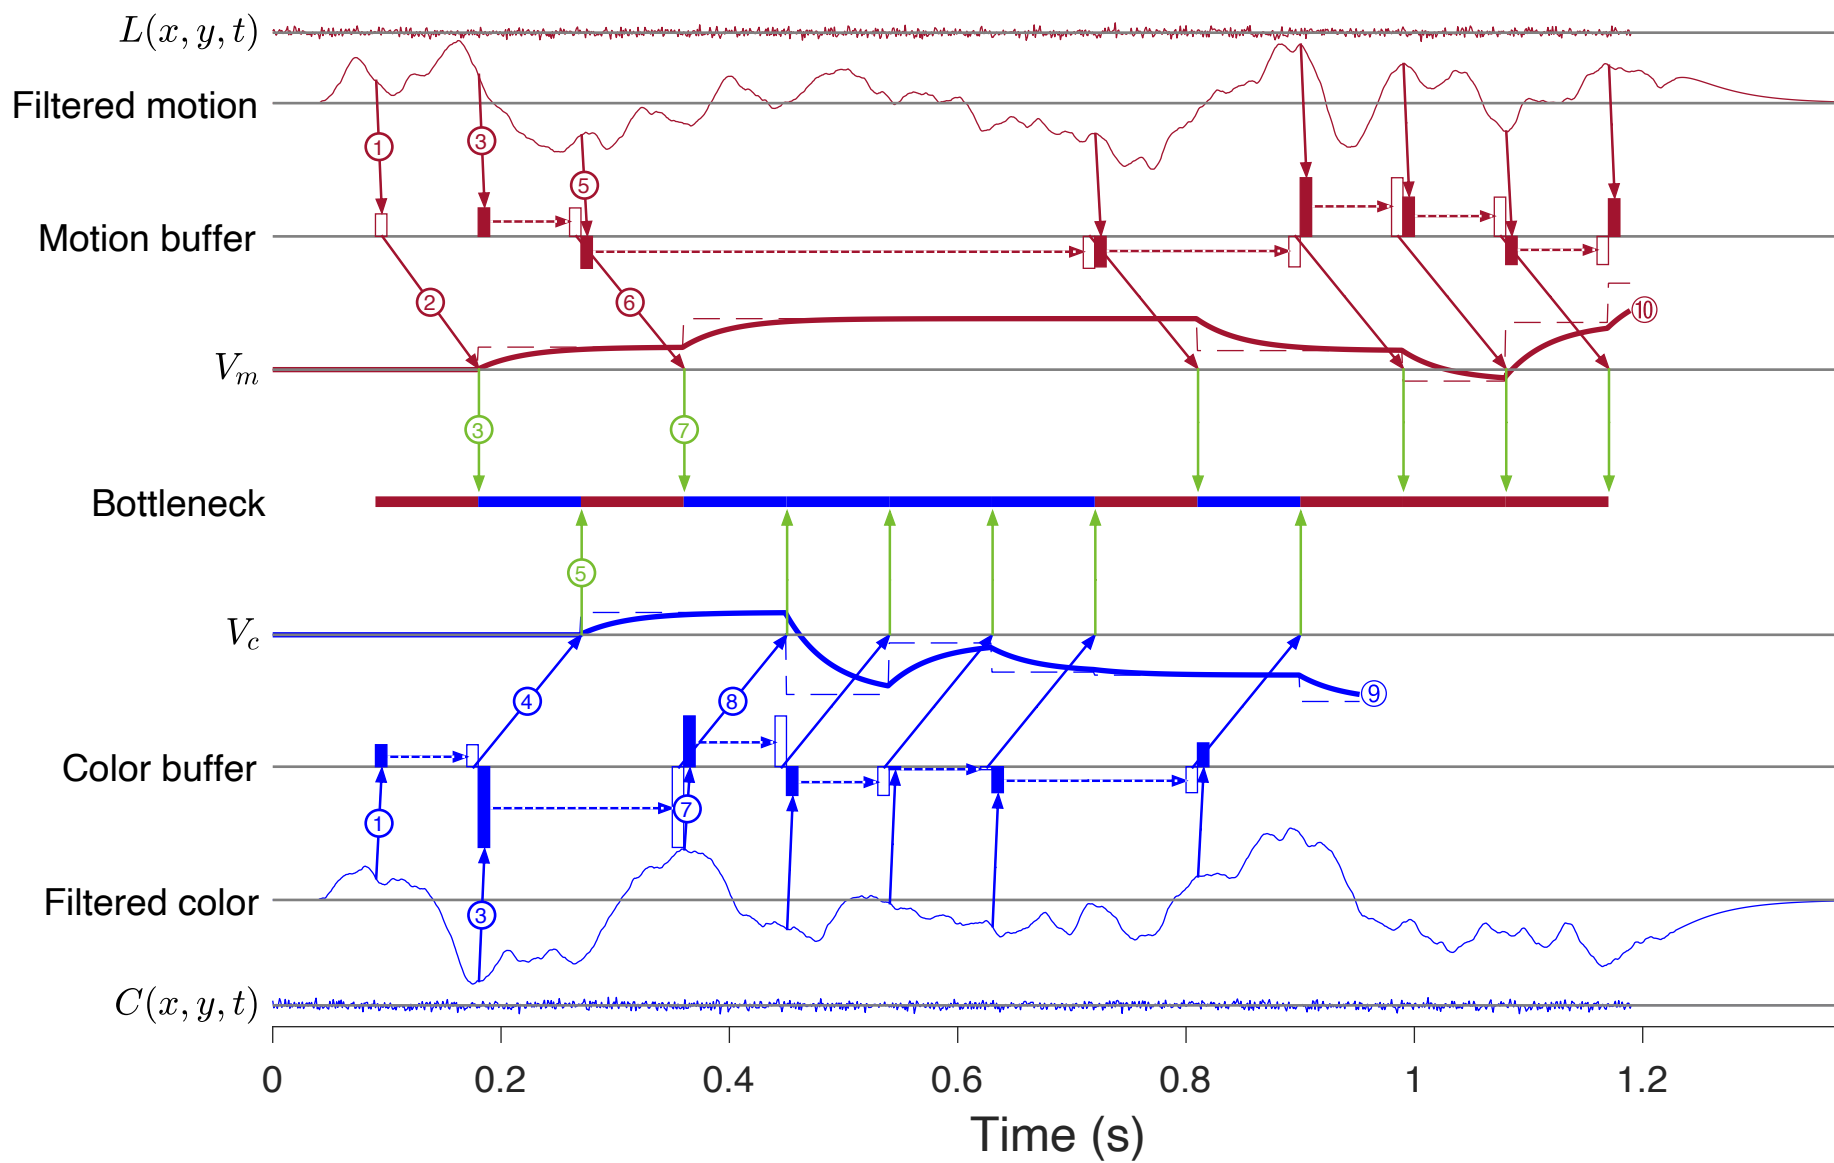

Supplement: supp [file elife-63721-supp-v1.zip]

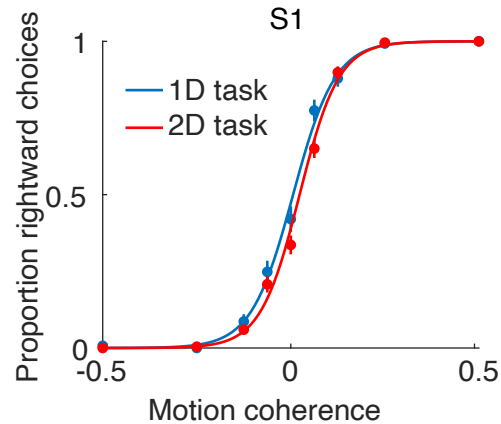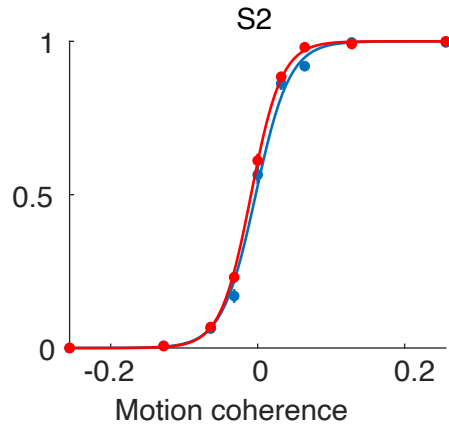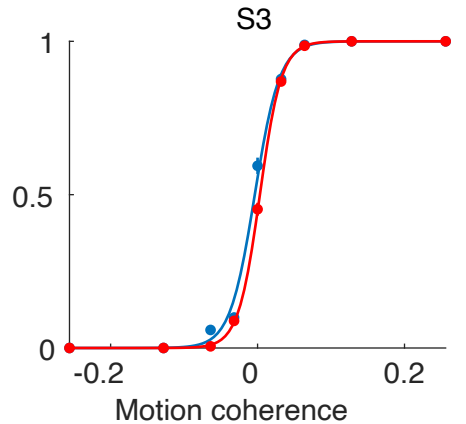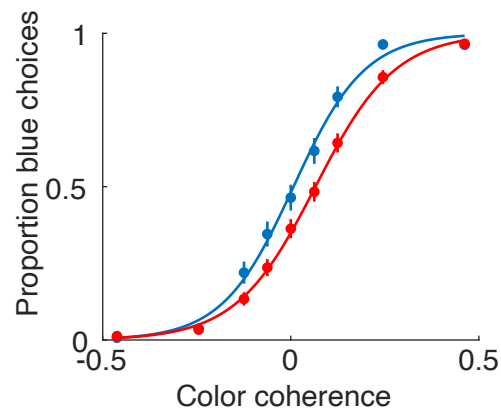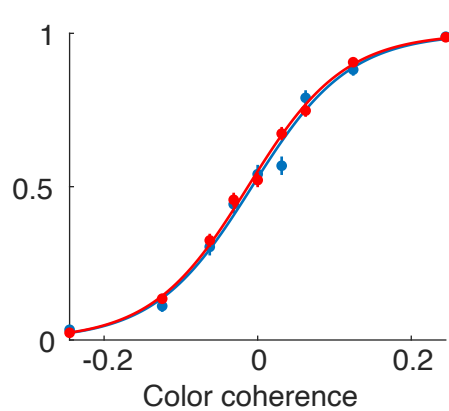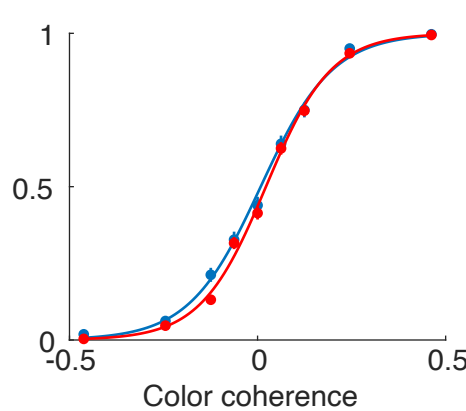

Supplement: supp [file elife-63721-supp-v1.zip]

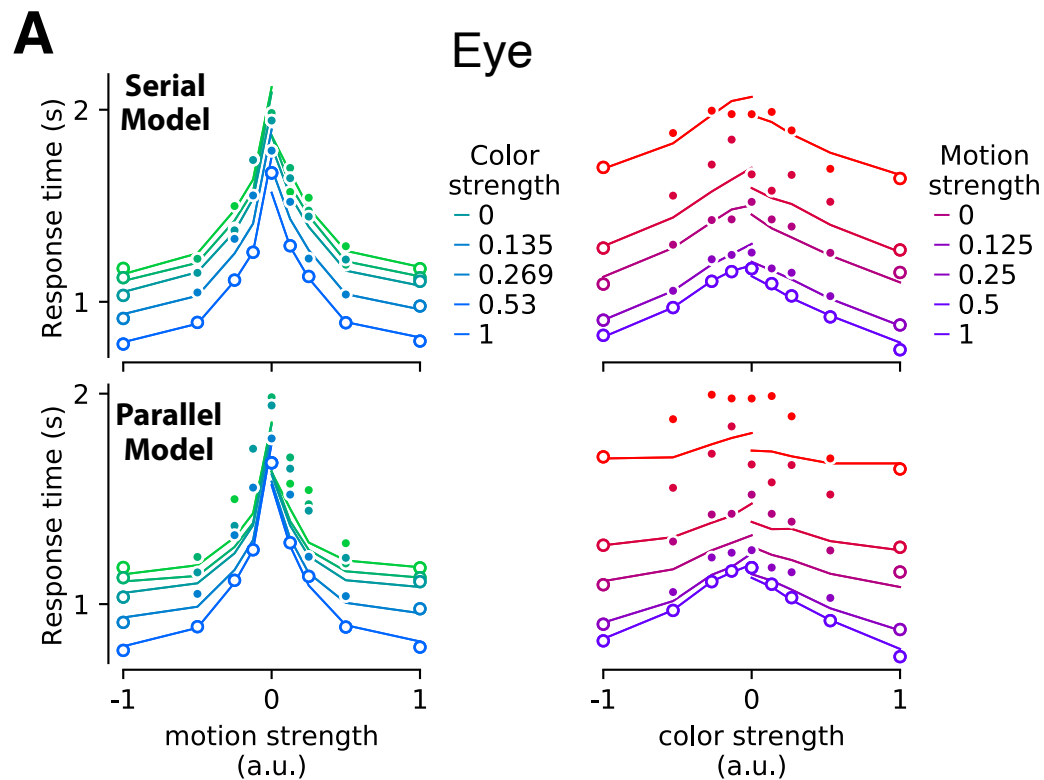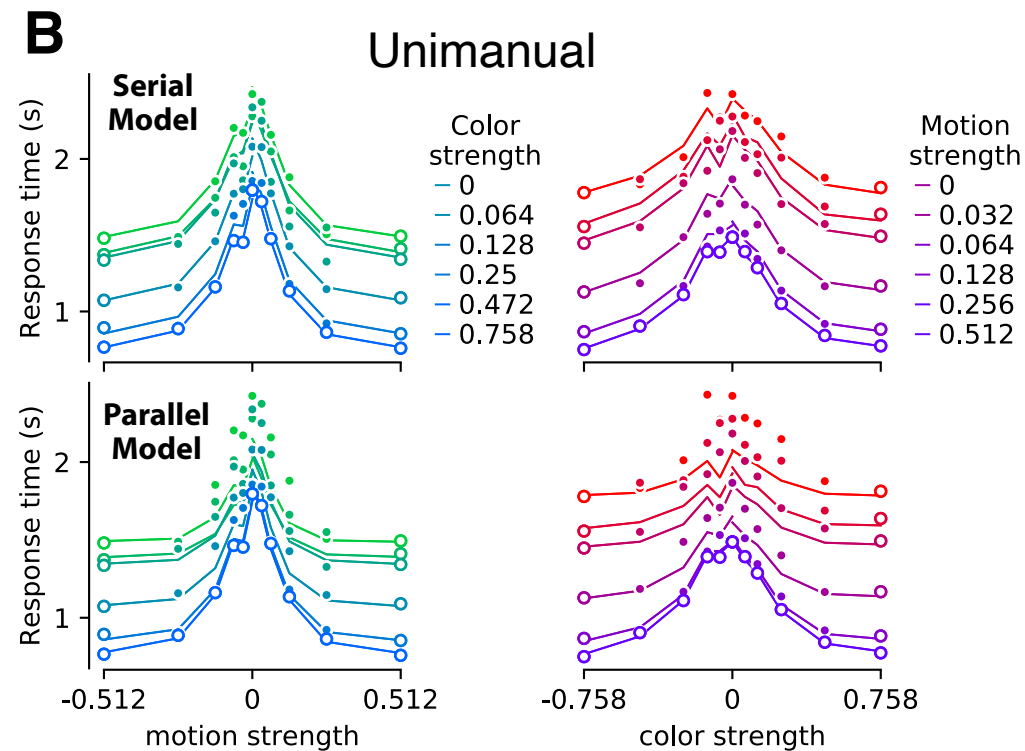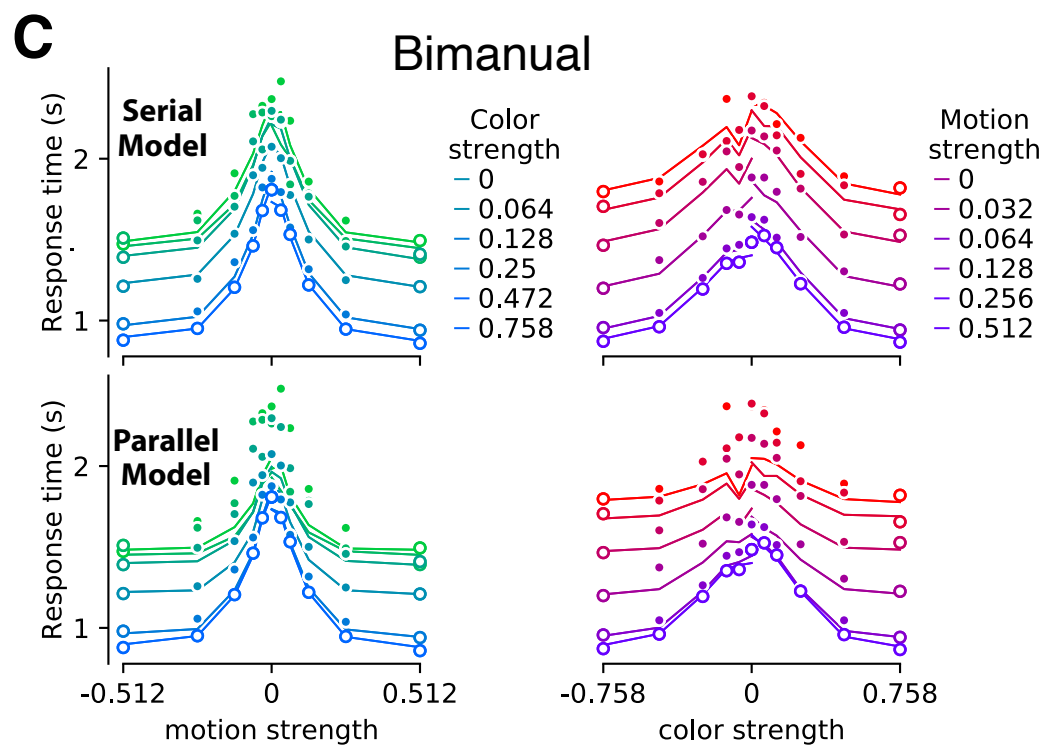

Supplement: supp [file elife-63721-supp-v1.zip]

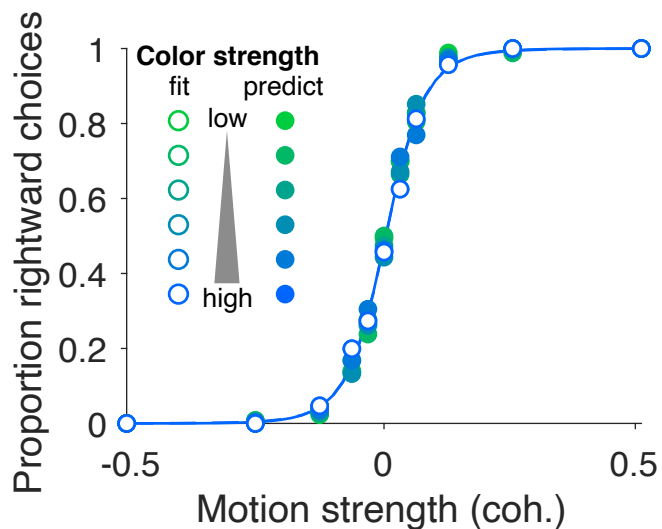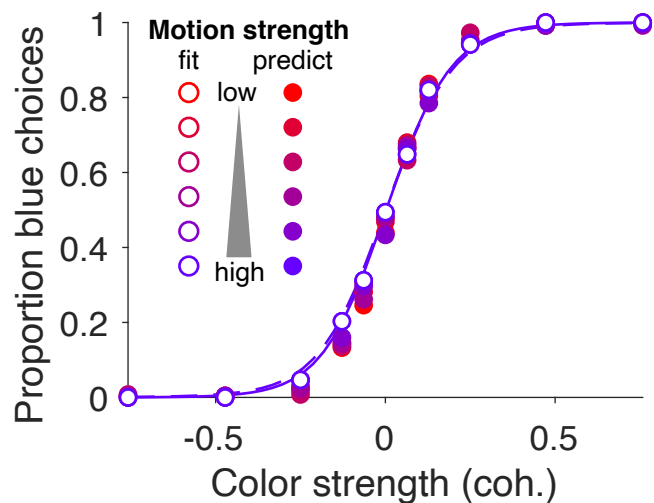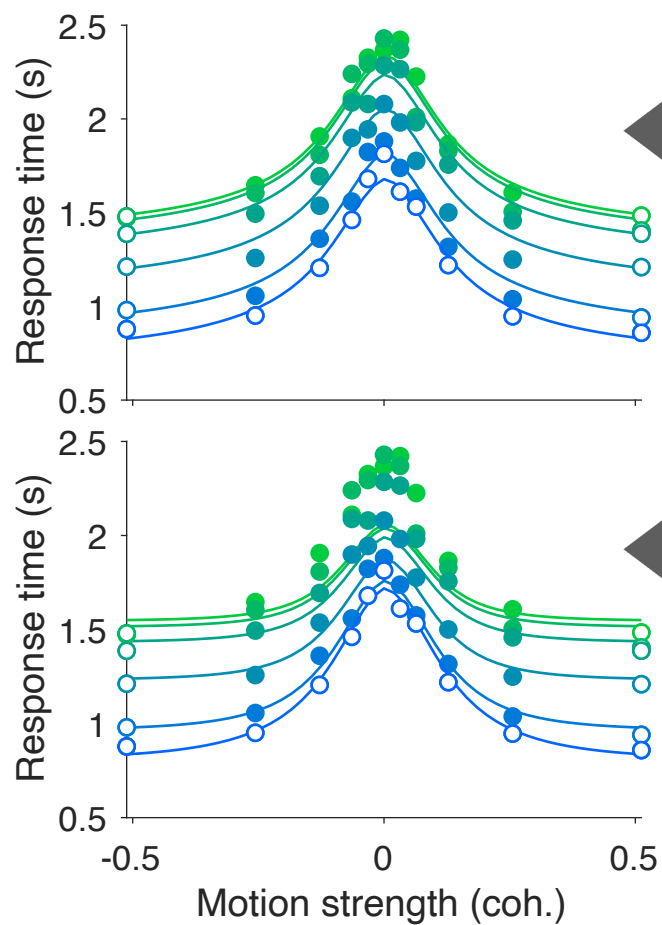

Serial  
Model

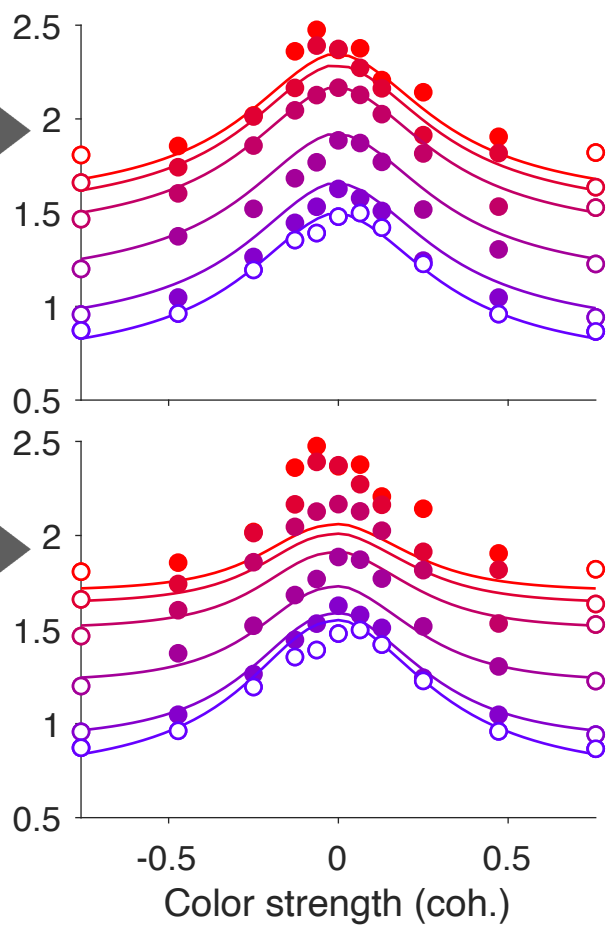

Parallel  
Model

Supplement: supp [file elife-63721-supp-v1.zip]

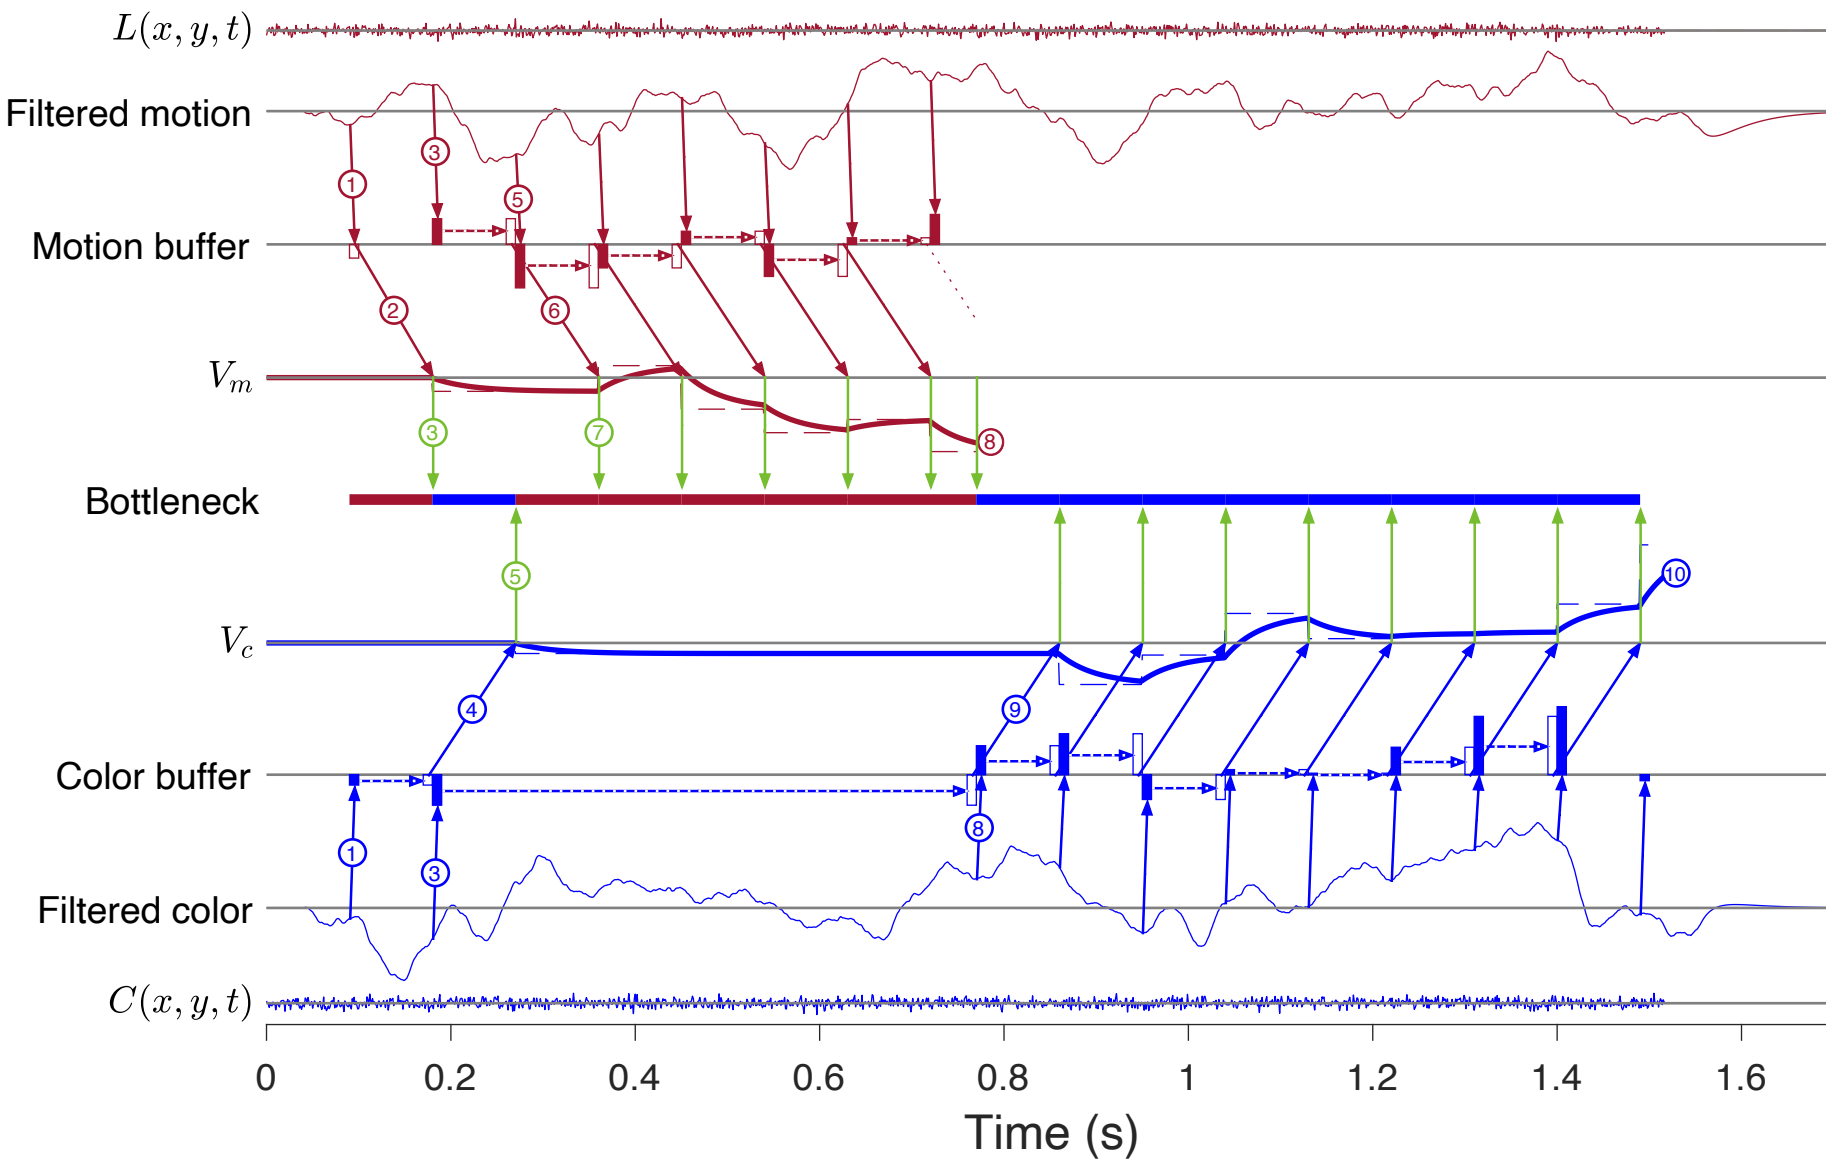

Supplement: supp [file elife-63721-supp-v1.zip]

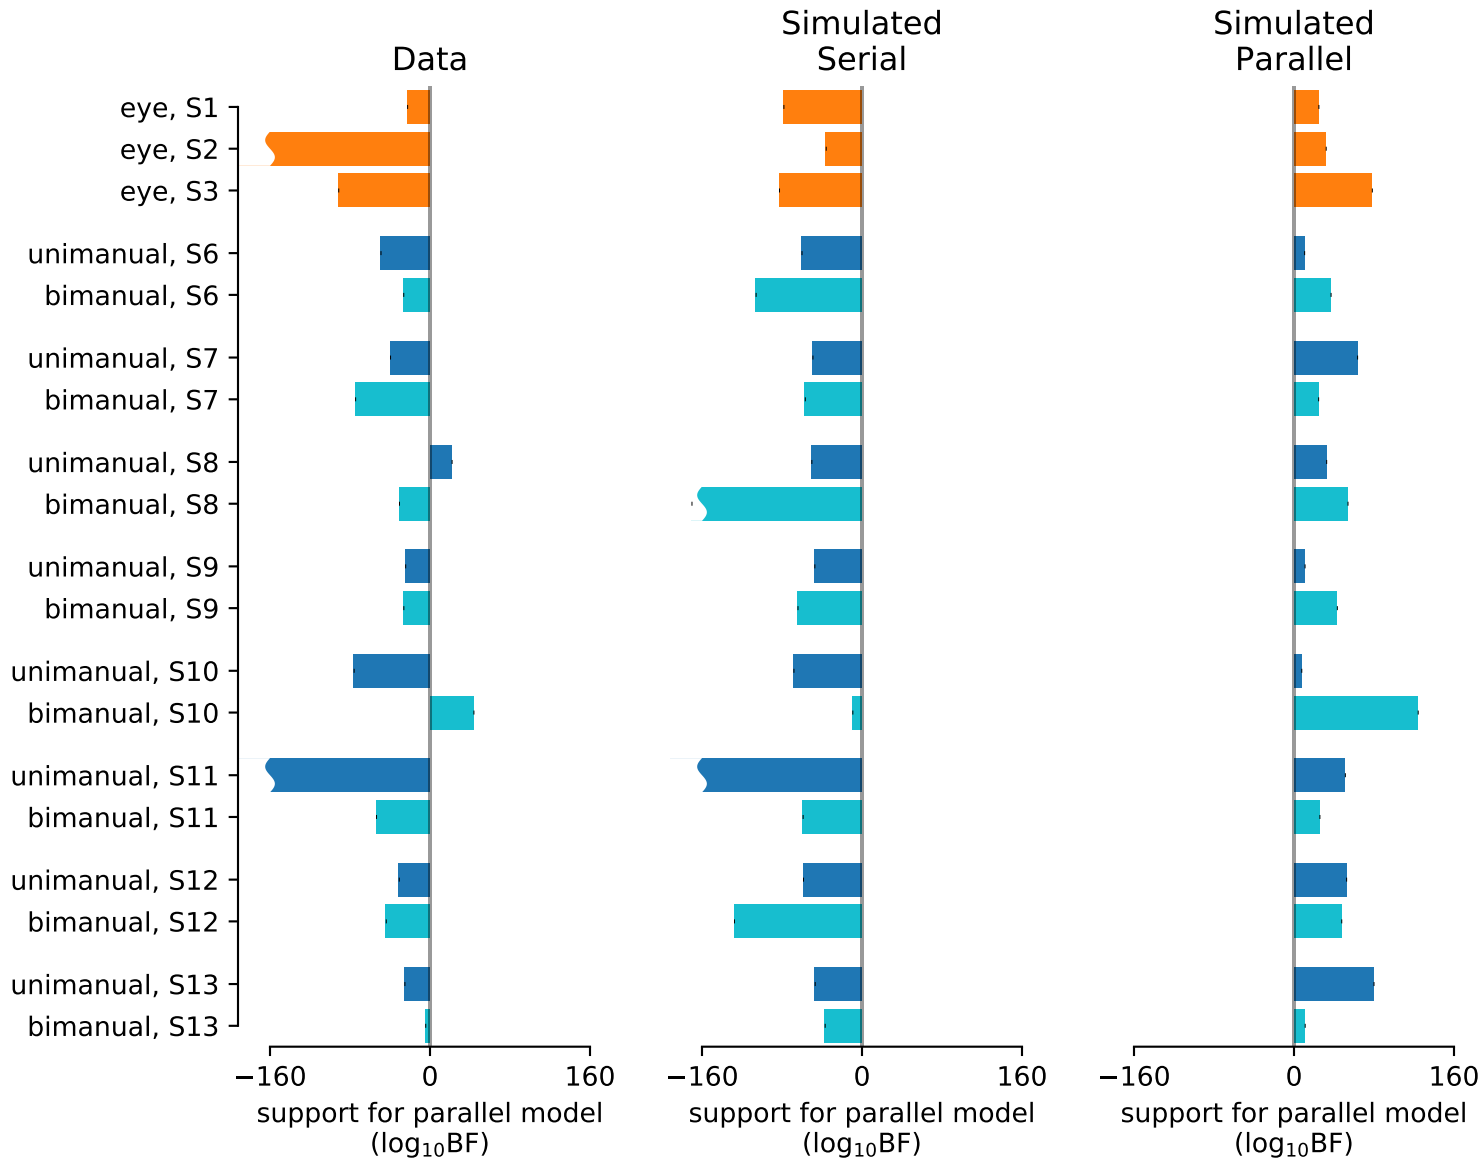

Supplement: supp [file elife-63721-supp-v1.zip]
